# 1 **Effect of nutrition assessment, counselling and support** 2 **integration on mother- infant nutritional status, practices** 3 **and health in Tororo and Butaleja districts, Uganda: A** 4 **comparative non equivalent quasi experimental study**

5  
6 **Samalie Namukose<sup>1</sup>, Gakenia Wamuyu Maina<sup>2</sup>, Suzanne N Kiwanuka<sup>1</sup> Fredrick Edward Makumbi<sup>3</sup>**

7  
8 **1** Department of Health Policy Planning and Management, School of Public Health, College  
9 of Health Sciences, Makerere University, Kampala Uganda

10 **2** Department of Community Health and Behavioural Sciences, School of Public Health,  
11 College of Health Sciences, Makerere University, Kampala Uganda

12 **3** Department of Epidemiology and Biostatistics, School of Public Health, College of Health  
13 Sciences, Makerere University, Kampala Uganda

14 \* [snamukoseb@gmail.com](mailto:snamukoseb@gmail.com)

15

## 16 **Abstract**

17 **Background:** Malnutrition remains a health challenge for women aged 15 to 49 years and their  
18 infants. While Nutrition Assessment Counselling and Support (NACS) is considered a  
19 promising strategy, evidence on its effectiveness remains scanty. This study assessed the effect  
20 of comprehensive NACS package on the mother-infant practices, health and nutrition outcomes  
21 in two districts in Eastern Uganda.

22 **Methods:** A comparative non-equivalent quasi-experimental design was employed with two  
23 groups; Comprehensive NACS (Tororo) and Routine NACS (Butaleja). Pregnant mothers  
24 were enrolled spanning various trimesters and followed through the antenatal periods and post-

NOTE: This preprint reports new research that has not been certified by peer review and should not be used to guide clinical practice.

25 delivery for health and nutrition status. Infants were followed for feeding practices, health and  
26 nutritional status at birth and weeks 6, 10, 14 and at month 6, 9 and 12 post-delivery.

27 Propensity score matching ensured study group comparability. The NACS effect was estimated  
28 by nearest neighbour matching and the logistic regression methods. Statistical analysis utilised  
29 STATA version 15 and R version 4.1.1.

30 **Results:** A total of 666/784 (85%) with complete data and were analysed (routine: 412,  
31 comprehensive: 254). Both groups were comparable by mothers' age, MUAC, prior antenatal  
32 visits, meal frequency, micronutrient supplementation and instances of maternal headache,  
33 depression and diarrhoea. However, differences existed in gestation age, income, family size,  
34 education and other living conditions.

35 Comprehensive NACS infants exhibited higher infant birth weights, weight- for- age z-scores  
36 at the 3<sup>rd</sup> -6<sup>th</sup> visits ( $p<0.001$ ), length- for- age z scores at the 4<sup>th</sup> -7<sup>th</sup> visits ( $p<0.001$ ) and  
37 weight-for-length z-scores at the 3<sup>rd</sup> - 5<sup>th</sup> ( $p\leq 0.001$ ) visits. Despite fewer episodes of diarrhoea  
38 and fever, upper respiration infections were higher.

39 **Conclusion:** The comprehensive NACS demonstrated improved mother-infant nutritional and  
40 other health outcomes suggesting the need for integrated and holistic care for better maternal,  
41 infant and child health.

42 **Keywords:** Effect, nutrition assessment counselling and support, practices, health and nutrition  
43 outcomes, mothers, infants.

44

45

## 46 **Introduction**

47

48 Maternal and infant malnutrition is a significant global health concern with significant  
49 implications on the overall health and well-being of both the mothers and their infants. The  
50 Global Nutrition report of 2022 [1] indicated that 29.9% of women of reproductive age suffer  
51 from anaemia while 9.1% of all women were underweight. The prevalence of low birth weights  
52 was 14.6% among the newborns while 22%, 6.7% and 5.7% of children under 5 years were  
53 stunted, wasted and overweight respectively. In the same report, Sub-saharan Africa was noted  
54 to contribute to the highest burden of malnutrition with 32.6% of children under 5year stunted,  
55 5.2% wasted and 4% overweight while anaemia among the women of reproductive age was  
56 31.9%. According to the Uganda Demographic Health Survey (UDHS) of 2016 [2], the  
57 prevalence of stunting among children under 5 years was 29% while underweight and wasting  
58 was 11% and 4% respectively. Additionally, aneamia affects 32% of the women of  
59 reproductive age. These surveys and reports indicate the persistent challenge of malnutrition  
60 among the women of reproductive health and children calling for urgent need for intervention  
61 and improvement.

62 Maternal nutrition is vital for the health and well being of both the mother and her developing  
63 infant. Maternal interventions aimed at improving nutrition practices before pregnancy, during  
64 pregnancy and lactation have been extensively studied for their potential to enhance maternal  
65 and infant health down the line [3–7]. Well nourished and healthy mothers are more likely to  
66 give birth to health babies, experience a healthy pregnancy and are less likely to experience  
67 life-threatening complications during pregnancy [8,9].

68

69 Several studies have demonstrated the positive impact of maternal interventions on the  
70 nutrition practices and growth of infants particularly when implemented in a multi-sectoral  
71 approach. For instance, implementation of a comprehensive range of interventions such as;  
72 breastfeeding promotion, education and counselling, maternal mental health, women  
73 empowerment, family planning, water, hygiene and sanitation, agricultural interventions has

74 shown promising results in reducing stunting rates [10]. Notable studies by Olutayo et al [11],  
75 Nadia et al [12], Bhutta et al [13] emphasize the importance of these holistic interventions in  
76 reducing stunting. However, it is important to consider the perspective put forth by  
77 USAID/Advancing Nutrition [14] which argues against using stunting as a primary indicator  
78 of success of short term or single interventions at individual. Instead, stunting should be  
79 interpreted as a reflection of the population's well-being. This view suggests a more  
80 comprehensive assessment of interventions success focusing of multiple short and long term  
81 causal factors to malnutrition instead of looking at the immediate outcomes.

82 Additionally, numerous studies have shown that Nutrition Counselling and education during  
83 pregnancy significantly improve maternal-infant nutrition practices as well as the overall health  
84 and nutritional status of both mothers and infants. Dearden et al [15] demonstrated a positive  
85 effect of nutrition counselling and education on maternal meal frequency and diet  
86 diversification. These findings align with a quasi- experimental study conducted by Kaleem et  
87 al [16] which indicated that Antenatal Counselling improved the maternal dietary practices  
88 and nutritional status. Similarly, a study by Perez-Escamilla et al [17] revealed a positive  
89 effect of maternal counselling on maternal and infant health and nutrition outcomes including  
90 birth weights and prevention of pre-term births. In contrast, Ghosh-Jereth et al [18] found that  
91 the maternal dietary intake remained low and anaemia rates were high despite targeted  
92 antenatal care including counselling at every visit. The authors attributed this lack of  
93 improvement to the poor quality of counselling, a finding also echoed by Nsiah-Asamoah et al  
94 [19] in their study on nutrition counselling interactions between the health workers and  
95 caregivers. While some studies showed positive effect of maternal nutrition counselling on the  
96 maternal-infant health and nutrition outcomes, contrasting findings indicate that the quality of  
97 the counselling and how it is delivered can have negative impact on these outcomes. More  
98 research is needed to bridge this gap and provide a clearer understanding on the effect of  
99 delivery of a comprehensive package including counselling on the mother-infant health and  
100 nutrition outcomes.

101 Therefore, providing high-quality health services, including preventive health services,  
102 antenatal, maternity and postnatal services as well as early diagnosis and treatment of medical  
103 conditions such as anaemia is crucial for improving women's health. The World Health  
104 Organisation (WHO) and the Ministry of Health, Uganda recommends a comprehensive  
105 package of nutrition interventions to pregnant women for a positive outcome, including  
106 counselling on healthy eating and physical activity, guidance on infant and young child feeding,  
107 nutrition education on energy and protein intake, and daily iron and folic acid supplements.  
108 The package also includes energy and protein dietary supplements and high-protein  
109 supplements for the undernourished populations [20,21].

110 Even before the release of the WHO guidelines in 2020, the Ministry of Health in Uganda had  
111 been implementing NACS initiative, aiming to integrate nutrition into the health system and  
112 consequently improving the health and nutrition practices and outcomes of the beneficiaries.  
113 The NACS intervention package was tailored to the specific nutrition needs of the clients and  
114 was in line with WHO's recommendations on maternal nutrition care. Support was provided  
115 to mothers and their children, covering aspects such as optimal maternal nutrition, diversified  
116 diets, iron/folic acid supplementation, iodated salt consumption, deworming, malaria  
117 prevention, and provision of antenatal care package and encouragement to attend all the 8  
118 visits. Breastfeeding education emphasized early initiation, exclusive breastfeeding for 6  
119 months, and extended breastfeeding. Mothers of older infants received guidance on  
120 complementary feeding practices. Caregivers of sick children were advised on continued  
121 breastfeeding. The community system offered ongoing health and nutrition care, including  
122 livelihood and economic support to improve the health and nutrition outcomes. The  
123 malnourished mothers received therapeutic foods [22].

124 While existing literature has assessed the impact of vertical maternal interventions on the health  
125 and nutritional status of mothers and infants, there is limited body of research on the effect of  
126 broad integrated interventions, such as NACS on the health and nutrition outcomes of  
127 beneficiaries. This study therefore, sought to assess the effect of comprehensive NACS  
128 package on the health and nutrition practices and status of mothers and their infants in Tororo

129 and Butaleja districts in Eastern Uganda. We tested the hypotheses that there was no difference  
130 in the maternal-infant health, nutrition practices and outcomes between the facilities which  
131 integrated comprehensive NACS, verses those with routine NACS. The findings of this study  
132 contribute to the growing body of evidence on the effectiveness of broad integrated  
133 interventions on the health and nutrition outcomes of the beneficiaries and provide insights and  
134 recommendations for scaling up the NACS approach.

### 135 **Pathways on the effect of NACS integration in the health system on maternal and infant** 136 **health, nutrition practices, and outcomes**

137 Integration of comprehensive NACS into the health system will result into an integrated  
138 nutrition service delivery system which aims to foster a productive interaction between the  
139 service providers and mothers. Based on the health belief model, service providers were  
140 expected be motivated to impart knowledge and skills to mothers, enabling them take charge  
141 of their own health and nutrition. Based on the health belief model, these empowered mothers  
142 would then embrace optimal nutrition practices resulting in enhanced health and nutrition well-  
143 being. Consequently, this positive change would improve the health and nutrition outcomes of  
144 their infants, as illustrated in **S1 Fig**

145 **Insert S1 Fig**

146

## 147 **Material and Methods**

### 148 **Study Design**

149 The study used a comparative non-equivalent quasi-experimental design with two groups;  
150 comprehensive NACS integration compared to routine NACS integration.

151

### 152 **Study Setting and population**

153 The study involved pregnant and lactating mothers, along with their respective infants. The  
154 two hospitals selected for the study were Tororo Hospital as the comprehensive NACS and  
155 Busolwe Hospital as the routine NACS. The hospitals were similar by level of facility,  
156 ownership, funding, staffing norms, services provided and client load. Pregnant mothers in  
157 various trimesters were enrolled and their health and nutrition status monitored at the antenatal  
158 visits and post-delivery. Only women accessing antenatal care and residing in Tororo and  
159 Butaleja were included. During post-delivery, infants were monitored for their feeding  
160 practices, health and nutrition status till 12 months.

161 Mothers and infants were followed through the scheduled visits at their respective health  
162 service points, which included, antenatal, labour suite/maternity, postnatal, children wards,  
163 young child and ART clinics.

164

## 165 **Comprehensive NACS versus routine service delivery**

166 The comprehensive NACS package targeted both the health workers and mothers with their  
167 infants. The support to the health workers included: five-day training in NACS and Health  
168 Management Information System (HMIS) for nutrition in-service courses for staff at key health  
169 contact points, such as antenatal clinics, maternity, postnatal clinics, young child and HIV  
170 clinics; provision of anthropometric equipment, policy guidelines, job aides, information,  
171 education and communication materials for mothers; mentorships/support supervision of  
172 health staff to ensure quality service delivery; monitoring and reporting of nutrition  
173 interventions; employing quality improvement support to address gaps in NACS  
174 implementation; linking study subjects to community support structures for continuous  
175 nutrition care and support; and collaborating with key stakeholders and the district health  
176 management team to establish supervisory and support mechanisms for the intervention.

177 To the mothers and their infants, the package included: nutrition assessment and categorization  
178 of the nutritional status; health and nutrition education on a diversified diet, recommended  
179 antenatal clinic visits, iron/folic acid supplementation, water hygiene, and sanitation; maternal-

180 infant nutrition counselling; provision of therapeutic feeds to identified malnourished cases;  
181 active follow-up of mother-baby pairs to ensure they receive the necessary nutrition services.

182

### 183 **Routine service delivery**

184 In the routine NACS setting, some elements of NACS were integrated into the regular health  
185 care services provided such as growth monitoring and promotion for children, iron/folic acid  
186 supplementation. To ensure comparability, staff at both study settings were trained in NACS  
187 and HMIS for nutrition. They were provided with information, education and communication  
188 materials to enhance their capacity in nutrition education and counselling. Subsequently, the  
189 staff carried on with their services as per usual. The nutrition counselling placed a strong  
190 emphasis on promoting the consumption of locally available foods for the management of  
191 malnutrition. [23]

192 We determined the level of exposure to comprehensive verses routine NACS by closely  
193 supervising the data collection process and enhancing documentation of both the services  
194 rendered and the frequency with which the respondents accessed these services.

### 195 **Sampling**

196 The study employed purposive sampling approach, enrolling subjects who had given their  
197 consent on a continuous basis until the desired sample size was attained. In both study settings,  
198 the antenatal care clinic served as the entry point and the ANC register as the sampling frame.  
199 The enrolment of the study participants took 8 months from starting from 23<sup>rd</sup> October 2018 to  
200 25<sup>th</sup> May, 2019. The mothers were followed up till they gave birth, and the mother-infant pairs  
201 followed up for 12 months. Data was collected from 23<sup>rd</sup> October, 2018 to 25<sup>th</sup> July 2021.

202



203

## 204 **Sample size calculation**

205 The sample size was calculated using the formular by V. Kasiulevicius et al [24] based on  
206 infant underweight as an outcome variable.

$$207 \quad n = \frac{\left[ z_{\alpha} \sqrt{\left(1 + \frac{1}{m}\right) \bar{p}(1 - \bar{p})} + z_{\beta} \sqrt{\frac{p_0(1 - p_0)}{m} + p_1(1 - p_1)} \right]^2}{(p_0 - p_1)^2}$$

$$208 \quad \text{Where } \bar{p} = \frac{p_1 + mp_0}{m + 1}$$

209 **Where,**

210  $P_0$  was the probability of underweight infants in the control group – 0.113.

211  $P_1$  was the probability of underweight infants in the intervention group – 0.07

212  $P_0$  was based on the Uganda Demographic Health Survey 2011 burden of malnutrition in the  
213 eastern region while  $P_1$  was an estimated reduction in underweight with the intervention.

214 If  $\alpha$  (alpha) = 0.05 then  $z_{\alpha} = 1.96$

215 If  $\beta$  (beta) = 0.80, then  $z_{\beta} = 0.845$

216  $m$  was the number of control subjects per experimental subject = 2

217  $\bar{p} = 0.0987$

218  $n = 652$  with the inclusion of 20% loss to follow up of mother-baby pairs. A sample size of 652  
219 (217 in the intervention group and 435 in the control group) was estimated to detect a 4.3%  
220 reduction in the underweight infants at 80% power and 5% level of significance.

221

## 222 **Data collection**

223 We pre-tested the data collection tools among the mothers and feedback was used to finalize  
224 the tools. The tool was designed in excel to facilitate the tracking of the mother- baby variables  
225 for their scheduled visits.

226 Our research assistants underwent training on the data collection tools and data capture  
227 methods at a minimum of four points: recruitment/baseline, antenatal clinic visits, delivery and  
228 postnatal care clinic, and immunization scheduled visits. We encouraged mothers to deliver at  
229 the health facility where they were provided with a package of both routine and comprehensive  
230 package of services. To ensure data quality, we conducted regular supervision and spot checks.

231

232

233 At baseline/recruitment, we collected data on various aspects, including socio-economic and  
234 demographic characteristics, maternal health and nutrition practices, and maternal nutritional  
235 status. Throughout each antenatal visits, we monitored the mothers' anthropometric data,  
236 health status and nutrition practices. Following delivery, we collected data on infant's  
237 anthropometric measurement such as birth weight, length, head circumference as well as details  
238 about their feeding practices. Subsequently, we continued to track the infants' anthropometric  
239 data, health and nutrition practices and status during the scheduled immunization visits.

240 Anthropometric data and feeding practices for both the mother and her infant were collected  
241 using standard procedures. Mother's weight was taken to the nearest 0.1gm using a digital  
242 Uniscale. The infant weight was measured to nearest 0.1 gm using the neonatal weighing scales  
243 at birth and thereafter a digital uniscale. Infant length was measured to nearest 0.1cm using an  
244 infantometer at birth and a height board for the subsequent visits.

245 We measured the head circumference and Mid Upper Arm Circumference (MUAC) of infants  
246 using specialized tapes, with measurements recorded to the nearest 0.1cm. MUAC was  
247 measured for infants above 6 months and mothers. Additionally, we conducted health  
248 assessment for mothers, including evaluation for illnesses such as headaches, depression,  
249 diarrhea, fever and cough. For infants, we assessed episodes of diarrhea, fever and Upper  
250 Respiratory infections.

251 In total, there were 15 scheduled appointments from the time of mother's enrolment until the  
252 baby made 12 months of age. Mothers were encouraged to continue attending health facilities  
253 for continuous health care as well as participating in the informative health and nutrition  
254 education sessions.

255

## 256 **Data management**

257 We used excel for data capture, STATA version 15 for data, cleaning and performing bivariate  
258 tests on all confounding background variables for both study settings. The variables included;  
259 weeks of gestation, age of the mothers, mothers' education, marital status, mothers' occupation,

260 mothers' income, spouses' income, spouses' education level, previous ANC visits, distance to  
261 the health facility, type of transport used, total numbers of children, number of children alive,  
262 number of family members, number of children under 5 years, fuel for cooking, water source  
263 and faecal matter disposal. We cleaned data by synchronising the variable codes for the two  
264 data sets, checked for missing data, and excluded the variables with insignificant data.

265 We characterised variables as continuous, binary, categorical and generated new variables. We  
266 checked the data set for normal distribution for the continuous variables. Descriptive analysis  
267 was conducted to compare mothers' background characteristics in the 2 study arms. Continuous  
268 variables were compared using a 2 sample t-test while the categorical variables were compared  
269 using the chi square test.

## 270 **Data analysis**

271 Because these groups were not randomly assigned and this being a quasi non- equivalent  
272 experimental study, we conducted propensity score matching to minimise potential imbalance  
273 and also create reasonable comparable groups, before assessment of the effectiveness of the  
274 NACS intervention.

275 By creating more comparable intervention and control groups, propensity score matching can  
276 result into a more precise estimates of intervention effects and reducing confounders. On the  
277 other hand, matching reduces the sample size, because not all individuals may find suitable  
278 matches resulting in a loss of statistical power and precision [25–27].

279 The propensity score matching process involved; defining the intervention (comprehensive  
280 NACS) verses control (routine NACS) groups, identification of the variables before  
281 administration of the intervention, estimating the propensity scores, checking the initial balance  
282 of the variables for both groups using mean differences, using the nearest-neighbor matching  
283 method to pair individuals in intervention and control group based on their propensity scores,  
284 assessing the quality of the matches, and thereafter estimating the effect of comprehensive  
285 NACS on maternal-infant practices, health and nutritional status [27].

286 Using the R software version 4.1.1, we estimated the NACS effect on maternal-infant nutrition  
287 practices, health and nutritional status by comparing various methods such as nearest  
288 neighbour, null and full matching methods. The nearest neighbour matching using the logistic  
289 regression propensity score model provided the best balance compared to other matching  
290 methods such as; full matching using a probit regression propensity score, nearest neighbour  
291 matching using a probit regression propensity score, null probit, full matching using a logistic  
292 regression propensity score as determined by the lower standardised mean difference statistics.  
293 The enrolment and data analysis flow chart is illustrated in **S2 Fig**.

294 **Insert S2 Fig**

## 295 **Ethical approval**

296 This study was approved by: the Higher Degrees, Research, and Ethics Committee –  
297 Institutional Review Board at Makerere University School of Public Health (MaKSPH  
298 HDREC 24/01/2017), the Uganda National Council of Science and Technology (SS 4251), and  
299 the Office of the President in Uganda (ADM/194/212/01). An official letter from the Ministry  
300 of Health was written to the Tororo District Health Officer to seek for permission to conduct  
301 the study. The Principal Investigator informed both the District Health Officer and the District  
302 Resident Commissioner about the study plan before its execution. Participating mothers were  
303 asked to sign informed consent form. The mothers who were unable to read and write provided  
304 their informed consent using their thumbprint.

305

## 306 Results

307 A total of 784 mothers were enrolled in the study; 423 from the Routine NACS setting and 361  
308 from the Comprehensive NACS setting. One hundred (118) mothers were excluded from the  
309 analysis due to missing data while 666 mothers were considered in the final analysis, majority  
310 from the routine (412) compared to comprehensive (254) NACS groups.

311 The mothers' characteristics at enrollment were compared in the two study arms and the results  
312 are shown in the Tables 1 and 2. The findings indicated no significant difference between the  
313 mother's age ( $p=0.466$ ), prior antenatal visits for this pregnancy ( $p=0.316$ ), number of family  
314 members ( $p=0.007$ ) between the two groups at enrollment. However, there was a significant  
315 difference in the weeks of gestation ( $p=0.023$ ), mothers' income ( $p=0.000$ ), spouses' income  
316 ( $p=0.000$ ), number of children ( $p=0.000$ ), number of children alive ( $p=0.000$ ), number of children  
317  $< 5$  years ( $p=0.001$ ), distance to health facility ( $p<0.001$ ), mothers' education ( $p<0.001$ ), marital  
318 status ( $p<0.001$ ), mothers' occupation ( $p<0.001$ ), spouses' education ( $p<0.001$ ), type of transport  
319 ( $p<0.001$ ), cooking method ( $p<0.001$ ), water source ( $p<0.001$ ), and fecal matter disposal  
320 ( $p<0.001$ ).

321 Table 1. Mothers' characteristics at enrolment in the routine verses comprehensive study arms for  
322 continuous variables

| Variable name<br>(Comprehensive NACS=254, Routine NACS = 412) | t-test | p-value |
|---------------------------------------------------------------|--------|---------|
| Mothers' age                                                  | -0.730 | 0.466   |
| Weeks of gestation                                            | 2.277  | 0.023   |
| Mothers' income                                               | -4.682 | 0.000   |
| Spouse income                                                 | -4.997 | 0.000   |
| Prio antennal visits for this pregnancy                       | 1.003  | 0.316   |
| Number of children                                            | 11.400 | 0.000   |
| Number of children alive                                      | 5.725  | 0.000   |
| Number of family members                                      | 2.669  | 0.007   |
| Number of children less than 5 years                          | 6.842  | 0.000   |

323

324

325 Table 2. Mothers' characteristics at enrolment in the routine versus comprehensive NACS  
326 study arms for categorical variables before propensity score matching

| Variable name                      | Routine NACS<br>N=412 | Comprehensive<br>NACS<br>N=254 | Chi-square Test<br>(p-Value) |
|------------------------------------|-----------------------|--------------------------------|------------------------------|
| <b>Distance to health facility</b> |                       |                                |                              |
| <5 Km                              | 96.1%                 | 60.6%                          | <0.001                       |
| >5 km                              | 3.9%                  | 39.4%                          |                              |
| <b>Mothers Education</b>           |                       |                                |                              |
| No Education                       | 5.8%                  | 1.2%                           | <0.001                       |
| Primary                            | 62.9%                 | 44.9%                          |                              |
| Secondary                          | 26.9%                 | 40.6%                          |                              |
| Higher                             | 4.4%                  | 13.4%                          |                              |
| <b>Marital Status</b>              |                       |                                |                              |
| Married                            | 94.4%                 | 99.6%                          | <0.001                       |
| Not married                        | 5.6%                  | 0.4%                           |                              |
| <b>Mothers occupation</b>          |                       |                                |                              |
| Formal                             | 6.8%                  | 18.1%                          | <0.001                       |
| Informal                           | 93.2%                 | 81.9%                          |                              |
| <b>Spouse's education</b>          |                       |                                |                              |
| No Education                       | 4.2%                  | 1.2%                           | <0.001                       |
| Primary                            | 49.3%                 | 25.6%                          |                              |
| Secondary                          | 38.7%                 | 55.1%                          |                              |
| Higher                             | 7.8%                  | 18.1%                          |                              |
| <b>Type of transport</b>           |                       |                                |                              |
| Motorised                          | 50.7%                 | 92.1%                          | <0.001                       |
| Walking                            | 49.3%                 | 7.9%                           |                              |
| <b>Cooking method</b>              |                       |                                |                              |
| Firewood                           | 79.9%                 | 52.8%                          | <0.001                       |
| Charcoal                           | 19.9%                 | 46.1%                          |                              |
| Gas                                | 0.2%                  | 1.2%                           |                              |
| <b>Water source</b>                |                       |                                |                              |
| Well                               | 0.2%                  | 16.1%                          | <0.001                       |
| Borehole                           | 96.8%                 | 44.1%                          |                              |
| Tap water                          | 2.9%                  | 39.8%                          |                              |
| <b>Faecal matter Disposal</b>      |                       |                                |                              |
| Latrine                            | 99.3%                 | 89.0%                          | <0.001                       |
| Toilet                             | 0.7%                  | 11.0%                          |                              |

327

328

329 Propensity score matching was used to create comparability between the study groups. The Null  
 330 model was used to check the initial imbalance in the two groups that the matching methods  
 331 eliminated step wise. Table 3 shows severe imbalances as reflected by the standard mean  
 332 differences computed by the R software. All values close to zero in the standard mean differences  
 333 reflected better matches while those away from zero reflected severe imbalances. The variable  
 334 ‘number of children’ had the highest difference (-4.7263) indicating severe imbalance while the  
 335 variable ‘nutrition status by MUAC’ had the lowest difference (0.0019) indicating that mothers in  
 336 the both groups had comparable nutritional status, which conclusions resonate with exiting  
 337 literature [28].

338 Table 3: Propensity score matching null model for checking initial imbalance between the  
 339 comprehensive and routine NACS study arms

| <b>Variables</b>             | <b>Means Treated</b> | <b>Means Control</b> | <b>Mean difference</b> |
|------------------------------|----------------------|----------------------|------------------------|
| <b>Distance</b>              | 0.8513               | 0.1053               | 3.1896                 |
| <b>Mother age</b>            |                      |                      |                        |
| 15-24                        | 0.4762               | 0.5140               | -0.0758                |
| 25-49                        | 0.5238               | 0.4860               | 0.0758                 |
| <b>Mothers’ education</b>    |                      |                      |                        |
| 1. No Education              | 0.0119               | 0.0562               | -0.4082                |
| 2. Primary                   | 0.4444               | 0.6433               | -0.4001                |
| 3. Secondary                 | 0.4087               | 0.2556               | 0.3115                 |
| 4. Higher                    | 0.1349               | 0.0449               | 0.2634                 |
| <b>Marital status</b>        |                      |                      |                        |
| 1. Married                   | 0.9960               | 0.9438               | 0.8305                 |
| 2. Not Married               | 0.0040               | 0.0562               | -0.8305                |
| <b>Mothers’ occupation</b>   |                      |                      |                        |
| 1. Formal                    | 0.1825               | 0.0674               | 0.2980                 |
| 2. Informal                  | 0.8175               | 0.9326               | -0.2980                |
| <b>Spouse education</b>      |                      |                      |                        |
| 1. No Education              | 0.0119               | 0.0365               | -0.2269                |
| 2. Primary                   | 0.2579               | 0.5056               | -0.5661                |
| 3. Secondary                 | 0.5476               | 0.3820               | 0.3327                 |
| 4. Higher                    | 0.1825               | 0.0758               | 0.2762                 |
| <b>Prior ANC visits</b>      | 2.0397               | 2.1011               | -0.0626                |
| <b>Distance to hospital</b>  |                      |                      |                        |
| 1. Less than 5km             | 0.6111               | 0.9635               | -0.7228                |
| 2. ≥ 5km                     | 0.3889               | 0.0365               | 0.7228                 |
| <b>Type of transport</b>     |                      |                      |                        |
| 1. Walking                   | 0.0794               | 0.5028               | -1.5665                |
| 2. Motorized                 | 0.9206               | 0.4972               | 1.5665                 |
| <b>No. of children</b>       | 1.0198               | 2.6236               | -4.7263                |
| <b>No. of children alive</b> | 1.5437               | 2.4129               | -0.5786                |
| <b>No of chn &lt; 5years</b> | 0.7540               | 1.2809               | -0.6142                |
| <b>Type of fuel used</b>     |                      |                      |                        |
| 1. Firewood                  | 0.5278               | 0.7978               | -0.5408                |
| 2. Charcoal                  | 0.4603               | 0.2022               | 0.5178                 |
| 3. Gas                       | 0.0119               | 0.0000               | 0.1098                 |

|                                             |         |         |         |
|---------------------------------------------|---------|---------|---------|
| <b>Water source</b>                         |         |         |         |
| 1. Well                                     | 0.1627  | 0.0028  | 0.4332  |
| 2. Borehole                                 | 0.4405  | 0.9691  | -1.0648 |
| 3. Tap Water                                | 0.3968  | 0.0281  | 0.7537  |
| <b>Faecal matter disposal</b>               |         |         |         |
| 1. Latrine                                  | 0.8889  | 0.9916  | -0.3267 |
| 2. Toilet                                   | 0.1111  | 0.0084  | 0.3267  |
| <b>Mother wtg (kg) 1<sup>st</sup> visit</b> | 64.2496 | 60.7542 | 0.3124  |
| <b>Nutritional status by MUAC</b>           |         |         |         |
| 1. Normal (Green)                           | 0.9722  | 0.9719  | 0.0019  |
| 2. Malnourished (Yellow/Red)                | 0.0278  | 0.0281  | 0.0019  |
| <b>No. of meals</b>                         | 3.0992  | 2.8792  | 0.2940  |
| <b>Iron folic acid supplement</b>           |         |         |         |
| No                                          | 0.0238  | 0.0028  | 0.1377  |
| Yes                                         | 0.9762  | 0.9972  | -0.1377 |
| <b>History of headache</b>                  |         |         |         |
| No                                          | 1.0000  | 0.8034  | 0.6465  |
| Yes                                         | 0.0000  | 0.1966  | -0.6465 |
| <b>History of depression</b>                |         |         |         |
| No                                          | 1.0000  | 0.9803  | 0.1851  |
| Yes                                         | 0.0000  | 0.0197  | -0.1851 |
| <b>History of diarrhoea</b>                 |         |         |         |
| No                                          | 1.0000  | 0.9888  | 0.1393  |
| Yes                                         | 0.0000  | 0.0112  | 0.1393  |
| <b>History of fever</b>                     |         |         |         |
| No                                          | 0.9960  | 0.9298  | 1.0539  |
| Yes                                         | 0.0040  | 0.0702  | -1.0539 |
| <b>History of cough</b>                     |         |         |         |
| No                                          | 1.0000  | 0.9522  | 0.2927  |
| Yes                                         | 0.0000  | 0.0478  | -0.2927 |

340

### 341 **Effect NACS integration on the mothers-infant health, nutrition practices and** 342 **status**

343 The study assessed the effect of NACS integration on maternal-infant nutrition practices as well  
 344 as its effects on health and nutritional status. This assessment employed the nearest neighbour  
 345 matching method along with a logistic regression propensity score model and the results are shown  
 346 in Table 4.

347

348



349 Table 4. The effect of NACS integration on the mother-infant nutrition practices, health and  
350 nutrition status using nearest neighbour matching logistic regression propensity score model

351

| Variable name                                 | Contrast      |                  | Estimate | SE    | P value | CI             |
|-----------------------------------------------|---------------|------------------|----------|-------|---------|----------------|
|                                               | 1-(Comp NACS) | 0-(Routine NACS) |          |       |         |                |
| <b>Mother variables</b>                       | N=252         | N=252            |          |       |         |                |
| <b>Meal frequency at 2<sup>nd</sup> visit</b> | 1             | 0                | 0.008    | 0.070 | 0.911   | -0.13, -0.146  |
| <b>Diet Diversity Score</b>                   |               |                  |          |       |         |                |
| 2 <sup>nd</sup> visit                         | 1             | 0                | -3.110   | 0.263 | <0.001  | -3.630, -2.600 |
| 3 <sup>rd</sup> visit                         | 1             | 0                | -2.980   | 0.213 | <0.001  | -3.400, -2.560 |
| 4 <sup>th</sup> visit                         | 1             | 0                | -2.690   | 0.149 | <0.001  | 2.990, -2.400  |
| <b>Iron/ folic acid supplementation</b>       |               |                  |          |       |         |                |
| 2 <sup>nd</sup> visit                         | 1             | 0                | -0.029   | 0.010 | 0.006   | -0.049, -0.008 |
| 3 <sup>rd</sup> visit                         | 1             | 0                | -0.024   | 0.010 | 0.012   | -0.043, -0.005 |
| 4 <sup>th</sup> visit                         | 1             | 0                | -0.035   | 0.015 | 0.017   | -0.064, -0.006 |
| <b>Weight at</b>                              |               |                  |          |       |         |                |
| 2 <sup>nd</sup> visit                         | 1             | 0                | 1.040    | 0.272 | <0.001  | 0.507 -1.570   |
| 3 <sup>rd</sup> visit                         | 1             | 0                | 2.690    | 0.422 | <0.001  | 1.860 – 3.520  |
| 4 <sup>th</sup> visit                         | 1             | 0                | 5.860    | 1.990 | 0.003   | 1.950 – 9.760  |
| <b>Nut.status by (MUAC)</b>                   |               |                  |          |       |         |                |
| 2 <sup>nd</sup> visit                         | 1             | 0                | 0.038    | 0.018 | 0.032   | 0.003- 0.072   |
| 3 <sup>rd</sup> visit                         | 1             | 0                | 0.026    | 0.009 | 0.047   | 0.008 -0.044   |
| 4 <sup>th</sup> visit                         | 1             | 0                | 0.025    | 0.015 | 0.091   | 0.004- 0.054   |
| <b>History of headache</b>                    |               |                  |          |       |         |                |
| 2 <sup>nd</sup> visit                         | 1             | 0                | 0.020    | 0.009 | 0.020   | 0.003 - 0.037  |
| 3 <sup>rd</sup> visit                         | 1             | 0                | 0.044    | 0.013 | <0.001  | 0.020- 0.069   |
| 4 <sup>th</sup> visit                         | 1             | 0                | 0.078    | 0.022 | <0.001  | 0.034 - 0.121  |
| <b>History of depression</b>                  |               |                  |          |       |         |                |
| 2 <sup>nd</sup> visit                         | 1             | 0                | 0.013    | 0.007 | 0.070   | -0.001, -0.026 |
| 3 <sup>rd</sup> Visit                         | 1             | 0                | 0.008    | 0.005 | 0.160   | -0.003, -0.018 |
| <b>Diarrhoea at 3<sup>rd</sup> visit</b>      | 1             | 0                | 0.018    | 0.008 | 0.030   | 0.002 -0.034   |
| <b>History of fever</b>                       |               |                  |          |       |         |                |
| 2 <sup>nd</sup> visit                         | 1             | 0                | 0.020    | 0.009 | 0.019   | 0.003 - 0.037  |
| 3 <sup>rd</sup> visit                         | 1             | 0                | 0.049    | 0.014 | <0.001  | 0.023 - 0.076  |
| 4 <sup>th</sup> visit                         | 1             | 0                | 0.030    | 0.013 | 0.021   | 0.005 - 0.055  |
| <b>Infant variables</b>                       |               |                  |          |       |         |                |
| <b>Infant birth weight</b>                    | 1             | 0                | 0.191    | 0.100 | 0.056   | -0.005, -0.387 |
| <b>Infant weight at</b>                       |               |                  |          |       |         |                |
| 3 <sup>rd</sup> visit                         | 1             | 0                | 1.050    | 0.111 | <0.001  | 0.835 - 1.270  |
| 4 <sup>th</sup> Visit                         | 1             | 0                | 1.130    | 0.106 | <0.001  | 0.923 - 1.340  |
| 5 <sup>th</sup> visit                         | 1             | 0                | 1.930    | 0.107 | <0.001  | 1.720 - 2.140  |

|                                               |   |   |        |       |        |                |
|-----------------------------------------------|---|---|--------|-------|--------|----------------|
| <b>Infant head cirm</b>                       |   |   |        |       |        |                |
| 3 <sup>rd</sup> visit                         | 1 | 0 | 3.900  | 0.248 | <0.001 | 3.410 - 4.380  |
| 4 <sup>th</sup> visit                         | 1 | 0 | 3.900  | 0.248 | <0.001 | 3.410 - 4.380  |
| 5 <sup>th</sup> visit                         | 1 | 0 | 0.020  | 0.009 | 0.019  | 0.003 -0.037   |
| <b>Wt for Age Z-scores</b>                    |   |   |        |       |        |                |
| 3 <sup>rd</sup> visit                         | 1 | 0 | 1.800  | 0.233 | <0.001 | 1.350-2.260    |
| 4 <sup>th</sup> visit                         | 1 | 0 | 1.700  | 0.208 | <0.001 | 1.290 -2.110   |
| 5 <sup>th</sup> visit                         | 1 | 0 | 2.730  | 0.202 | <0.001 | 2.330 – 3.130  |
| 6 <sup>th</sup> visit                         | 1 | 0 | 0.265  | 0.159 | 0.096  | -0.047, -0.577 |
| <b>Length for Age Z-scores</b>                |   |   |        |       |        |                |
| 4 <sup>th</sup> visit                         | 1 | 0 | 0.634  | 0.246 | 0.010  | 0.151 – 1.120  |
| 5 <sup>th</sup> Visit                         | 1 | 0 | 0.761  | 0.222 | <0.001 | 0.326 – 1.200  |
| 6 <sup>th</sup> visit                         | 1 | 0 | 3.990  | 0.281 | <0.001 | 3.440 – 4.540  |
| 7 <sup>th</sup> visit                         | 1 | 0 | 4.630  | 1.140 | <0.001 | 2.470 – 6.780  |
| <b>Wt. for Length Z-scores at</b>             |   |   |        |       |        |                |
| 3 <sup>rd</sup> visit                         | 1 | 0 | 6.250  | 0.475 | <0.001 | 5.320 – 7.180  |
| 4 <sup>th</sup> visit                         | 1 | 0 | 1.460  | 0.356 | <0.001 | 0.763 – 2.160  |
| 5 <sup>th</sup> visit                         | 1 | 0 | 2.770  | 0.342 | <0.001 | 2.100 – 3.440  |
| <b>History of Upper Respiratory Infection</b> |   |   |        |       |        |                |
| 5 <sup>th</sup> Visit                         | 1 | 0 | 0.043  | 0.013 | <0.001 | 0.018 - 0.069  |
| 6 <sup>th</sup> visit                         | 1 | 0 | 0.155  | 0.023 | <0.001 | 0.110 - 0.199  |
| 7 <sup>th</sup> visit                         | 1 | 0 | 0.294  | 0.029 | <0.001 | 0.237 - 0.350  |
| 8 <sup>th</sup> visit                         | 1 | 0 | 0.315  | 0.029 | <0.001 | 0.258 - 0.372  |
| <b>History of infant diarrhoea</b>            |   |   |        |       |        |                |
| 5 <sup>th</sup> visit                         | 1 | 0 | -0.168 | 0.080 | 0.036  | -0.324, -0.011 |
| 6 <sup>th</sup> visit                         | 1 | 0 | -0.146 | 0.080 | 0.067  | -0.302- 0.010  |
| 7 <sup>th</sup> visit                         | 1 | 0 | -0.033 | 0.049 | 0.506  | -0.130- 0.064  |
| 8 <sup>th</sup> visit                         | 1 | 0 | -0.126 | 0.067 | 0.061  | -0.130- 0.064  |
| <b>History of infant fever</b>                |   |   |        |       |        |                |
| 1 <sup>st</sup> visit                         | 1 | 0 | -0.054 | 0.030 | 0.072  | -0.113- 0.005  |
| 3 <sup>rd</sup> visit                         | 1 | 0 | -0.005 | 0.012 | 0.694  | -0.029- 0.019  |
| 4 <sup>th</sup> visit                         | 1 | 0 | -0.409 | 0.086 | <0.001 | -0.576, -0.241 |
| 5 <sup>th</sup> Visit                         | 1 | 0 | -0.111 | 0.076 | 0.145  | -0.260- 0.038  |
| 6 <sup>th</sup> visit                         | 1 | 0 | -0.023 | 0.062 | 0.712  | -0.144 - 0.099 |
| 7 <sup>th</sup> visit                         | 1 | 0 | 0.028  | 0.050 | 0.569  | -0.070 - 0.126 |
| 8 <sup>th</sup> visit                         | 1 | 0 | -0.027 | 0.060 | 0.657  | -0.143- 0.090  |

352

353

354 Mothers in both groups were similar in terms of; meal frequency (p=0.911), iron/folic acid

355 supplementation at the 2<sup>nd</sup> -4<sup>th</sup> visits ( $\beta \leq -0.035$ ), maternal nutritional status by MUAC at the

356 2<sup>nd</sup> – 4<sup>th</sup> visits ( $\beta \leq 0.038$ ). Additionally there was no significant difference in maternal

357 instances of; headache at the 2<sup>nd</sup> -4<sup>th</sup> visits ( $\beta \leq 0.078$ ), depression at the 2<sup>nd</sup> -3<sup>rd</sup> visit  
358 ( $\beta \leq 0.013$ ) and diarrhoea at the 2<sup>nd</sup> -4<sup>th</sup> ( $\beta \leq 0.049$ ) visits.

359 Whereas mothers in the routine NACS group had a significantly higher diversity score at the  
360 2<sup>nd</sup> - 4<sup>th</sup> visits ( $p < 0.001$ ), the comprehensive group had higher weights at the 2<sup>nd</sup> - 4<sup>th</sup> ( $p \leq 0.003$ )  
361 visits. The difference in weights increased with number of visits right from the time of mothers'  
362 enrolment.

363 Compared to routine, infants born to mothers in the comprehensive group had a significantly  
364 higher; birth weights at 10% level of significance ( $p = 0.056$ , CI -0.005 – 0.387), weight-for-  
365 age at the 3<sup>rd</sup> -6<sup>th</sup> visits ( $p < 0.001$ ) with 20% reduction in underweight on average per visit.  
366 Furthermore, their length-for-age was significantly higher at the 4<sup>th</sup> -7<sup>th</sup> visits ( $p < 0.001$ ). The  
367 difference widened with the increasing number of visits. Similarly, the weight-for-length of the  
368 comprehensive NACS group was significantly much higher at the 3<sup>rd</sup> -5<sup>th</sup> visits ( $p < 0.001$ ). The  
369 difference remained constant throughout the subsequent visits.

370 Unlike the routine group, infants in the comprehensive NACS group had significantly higher  
371 episodes of upper respiratory infections at the 5<sup>th</sup> -8<sup>th</sup> ( $p < 0.001$ ,  $\beta \leq 0.315$ ). On the other hand,  
372 the routine NACS infants experienced a significantly higher episodes of; diarrhoea at the 5<sup>th</sup> -  
373 8<sup>th</sup> visits ( $p \leq 0.061$ ) and fever at the 1<sup>st</sup> ( $p = 0.072$ ,  $\beta = -0.054$ ) and 4<sup>th</sup> visits ( $p < 0.001$ ,  $\beta = -0.409$ ).

374

375

376

377

## 378 **Discussion**

379 The study aimed to assess the effect of NACS integration on the maternal-infant nutrition  
380 practices, health and nutritional status. The findings provide insights into the potential benefits  
381 of nutrition integration on the health system on the wellbeing of the mothers and their infants.  
382 The key findings in light of existing evidence and their implication are discussed.

383 The study found no significant difference in meal frequency among the mothers in both study  
384 groups, suggesting similar dietary habits. Compared to the comprehensive group, mothers in  
385 the routine NACS setting had a significantly higher diversity scores on all visits. This disparity  
386 may be attributed to the close proximity to the rural settings offering more natural and diverse  
387 food choices. Maternal nutritional status by MUAC estimates exhibited no significant  
388 differences across the visits in the two study settings. In contrast to the routine group, mothers  
389 in the comprehensive displayed significantly higher weights at the 2<sup>nd</sup>- 4<sup>th</sup> visits. This implied  
390 that integration of comprehensive NACS had positive progressive impact on maternal weight  
391 gain from the time of enrolment. The findings suggest potential program implication and  
392 highlight the need to consider environmental context when implementing nutrition programs.  
393 Future nutrition interventions should therefore be tailored to the specific needs and context of  
394 the target population. Furthermore, the study re-enforces, existing body of evidence indicating  
395 that maternal focused interventions particularly those with a multi-sectoral nature contribute to  
396 improved maternal diet diversity, micronutrient intake and overall nutritional status [29–31].

397 Additionally, there were minimal difference in iron/folic acid supplementation between the two  
398 groups at the 2<sup>nd</sup> - 4<sup>th</sup> visits implying consistent adherence to the Ministry of Health guidance  
399 on routine iron/folic acid supplementation among pregnant mothers in both settings. However,  
400 it is worth noting that the effect of iron/folic acid supplementation on haemoglobin levels in  
401 both settings could not be assessed in both settings due to lack of equipment and supplies.  
402 Studies by Michael Habtu et al [32], Sunita Taneja et al [7], Melesse Kuma et al [33] revealed  
403 elevated haemoglobin levels among women in the intervention group, findings that our study  
404 was unable to replicate due to the constraints related to equipment and supplies.

405 The estimates showed no difference between the two settings for maternal episodes of  
406 headache, depression and diarrhoea across the various visits. This implies that these health  
407 concerns are common and not influenced by the study settings. These need to be addressed in  
408 both setting for the well being of mothers.

409 Our investigation into the nutritional status of the infants revealed that integration of  
410 comprehensive NACS increased infant birth weights, reduced instances of underweight,  
411 stunted and wasted infants. This implies that nutrition integration had a potential benefit of on  
412 the foetal and infant growth and development. Our findings concur with; Veeena et al [34] M  
413 Barker et al [8] , Von Salmuth et al [10], Olutayo et al [11], Micheal Habtu et al [35] on the  
414 effectiveness of a holistic approach to improving the nutritional status of children.

415 Routine NACS infants experienced significantly more episodes of diarrhea and fever at the  
416 various visits than the comprehensive NACS group. The findings concur with Gonzalenz-  
417 Fernandez et al [36] in their study in which implementation of the multisectoral approach  
418 lowered the risk of diarrhoea and respiratory infections. This implies that the health facilities  
419 in the routine NACS settings did not comprehensively address these health concerns hence the  
420 need for more interventions for better health and nutrition outcomes.

421 One of the strengths of this study lies in its comparison of two separate groups; routine versus  
422 comprehensive and its close monitoring of the practices and outcomes of the study participants.  
423 This approach bolstered the study's findings, providing a clear and robust insight into the  
424 effectiveness of the integrated intervention package. Moreover the study places emphasis on  
425 favourable outcomes of comprehensive NACS highlighting the potential benefits of such  
426 comprehensive interventions, which findings are also consistent with the existing literature. On  
427 the other hand, the study lacked the ability to assess the impact of iron/folic acid  
428 supplementation on haemoglobin levels due to lack of equipment and supplies, which is a  
429 limitation in understanding the complete maternal health and nutrition outcomes.

## 431 **Conclusions**

432 The findings add to the existing body of evidence supporting improved maternal-infant health  
433 and nutrition practices and status with integrated nutrition services. While meal frequency,  
434 iron/folic acid supplementation were similar in the both groups, integration of comprehensive  
435 NACS intervention improved; maternal weights, infant birth weights, infant growth in light of  
436 weight-for-age, length-for-age and weight-for-length. This emphasises the potential benefits of  
437 integrated nutrition interventions in promoting the overall being of the mothers and their  
438 infants.

## 439 **Recommendations**

440 Based on the above findings, the Ministry of Health should consider: investing in acquiring  
441 the necessary equipment and supplies to assess the impact of iron/folic acid supplementation  
442 on haemoglobin levels for comprehensive evaluation of the women; scaling up integration of  
443 the comprehensive NACS in the health system as it has positive effect on the maternal-infant  
444 nutrition practices, health and nutrition outcomes; investing in digitization to ease monitoring  
445 and tracking trends in the health and nutrition status of the mother-infant pairs.

446 Future research can focus on implementation and effectiveness of digitization in monitoring  
447 and tracking of the maternal-infant health and nutritional status in an integrated health system.

448 Secondly, it will be important to investigate the experiences of the women and caregivers  
449 receiving these services.

450

## 451 **Supporting information**

452 S1 File Dataset for Tororo and Butaleja districts

453 S1 Fig. Pathways on the effect of NACS integration into the health system on maternal and  
454 infant health, nutrition practices, and outcomes adapted from the Chronic Care Model

455 S2 Fig. Enrolment and data analysis flow chart

## 456 **Acknowledgements**

457 We extend our appreciation to the political and administrative authorities of Tororo and  
458 Butaleja districts for granting us the necessary permission to conduct this study. Our gratitude  
459 go to the health workers as well as the mothers and their infants from Tororo and Butaleja  
460 districts for the dedicated participation in advancing this research undertaking. Brian Wakoli  
461 is appreciated for the statistical support rendered during the analysis.

## 462 **Author contribution**

463 **Conceptualization:** SN FEM GWM SNK

464 **Data Curation:** SN FEM SNK

465 **Formal analysis:** SN SNK FEM

466 **Funding acquisition:** SN

467 **Investigation:** SN

468 **Methodology:** SN SNK FEM

469 **Project administration:** SN

470 **Resources:** SN

471 **Software:** SN

472 **Supervision:** SN FEM GWM SNK

473 **Validation:** SN FEM GWM SNK

474 **Visualization:** SN FEM

475 **Writing- Original draft:** SN

476 **Writing – Review and editing:** SN FEM GWM SNK

477

## 478 **References**

- 479 1. Development Initiatives Poverty Research Ltd. Global Nutrition Report: Stronger  
480 commitments for greater action. Global Nutrition Report. Bristol. UK; 2022.  
481 Available:  
482 [http://www.segeplan.gob.gt/2.0/index.php?option=com\\_content&view=article&id=47](http://www.segeplan.gob.gt/2.0/index.php?option=com_content&view=article&id=472&Itemid=472)  
483 [2&Itemid=472](http://www.segeplan.gob.gt/2.0/index.php?option=com_content&view=article&id=472&Itemid=472)
- 484 2. UBOS. Uganda Demographic and Health Survey 2016. Udhs. 2016. Available:  
485 [www.DHSprogram.com](http://www.DHSprogram.com)
- 486 3. Marshall NE, Abrams B, Barbour LA, Catalano P, Christian P, Friedman JE, et al. The  
487 importance of nutrition in pregnancy and lactation: lifelong consequences. *Am J*  
488 *Obstet Gynecol.* 2022;226: 607–632. doi:10.1016/j.ajog.2021.12.035
- 489 4. Brink LR, Bender TM, Davies R, Luo H, Mketinas D, Shah N, et al. Optimizing  
490 Maternal Nutrition: The Importance of a Tailored Approach. *Curr Dev Nutr.* 2022;6:  
491 1–14. doi:10.1093/cdn/nzac118
- 492 5. Girard AW, Olude O. Nutrition education and counselling provided during pregnancy:  
493 Effects on maternal, neonatal and child health outcomes. *Paediatr Perinat Epidemiol.*  
494 2012;26: 191–204. doi:10.1111/j.1365-3016.2012.01278.x
- 495 6. Taneja S. Impact of an integrated nutrition, health, water sanitation and hygiene,  
496 psychosocial care and support intervention package delivered. *Bmc.* 2020;8: 1–18.
- 497 7. Taneja S, Upadhyay RP, Chowdhury R, Kurpad A V., Bhardwaj H, Kumar T, et al.  
498 Impact of nutritional interventions among lactating mothers on the growth of their  
499 infants in the first 6 months of life: A randomized controlled trial in Delhi, India. *Am J*  
500 *Clin Nutr.* 2021;113: 884–894. doi:10.1093/ajcn/nqaa383
- 501 8. M Barker, SU Dombrowski, T Colbourn, CHD Fall, NM Kriznik, W Lawrence, SA  
502 Norris, G Ngaiza, D Patel, J Skordis-Worrall, FF Sniehotta, R Steegers-Theunissen, C  
503 Vogel, K Woods Townsend and JS. Intervention strategies to improve nutrition and  
504 health behaviours before conception. *Lancet.* 2018;391: 1853–1864.  
505 doi:10.1016/S0140-6736(18)30313-1.Intervention
- 506 9. Harriet Torlesse, Nita Dalmiya VT and VA. Counselling to improve maternal



- 507 nutrition: Considerations for programming with quality, equity and scale. Unicef.  
508 2021; 1–16.
- 509 10. Von Salmuth V, Brennan E, Kerac M, McGrath M, Frison S, Lelijveld N. Maternal-  
510 focused interventions to improve infant growth and nutritional status in lowmiddle  
511 income countries: A systematic review of reviews. PLoS One. 2021;16: 1–30.  
512 doi:10.1371/journal.pone.0256188
- 513 11. Adeyemi O, Toure M, Covic N, van den Bold M, Nisbett N, Headey D. Understanding  
514 drivers of stunting reduction in Nigeria from 2003 to 2018: a regression analysis. Food  
515 Secur. 2022;14: 995–1011. doi:10.1007/s12571-022-01279-8
- 516 12. Akseer N, Vaivada T, Rothschild O, Ho K, Bhutta ZA. Understanding multifactorial  
517 drivers of child stunting reduction in exemplar countries: A mixed-methods approach.  
518 Am J Clin Nutr. 2020;112: 792S-805S. doi:10.1093/ajcn/nqaa152
- 519 13. Bhutta ZA, Akseer N, Keats EC, Vaivada T, Baker S, Horton SE, et al. How countries  
520 can reduce child stunting at scale: Lessons from exemplar countries. Am J Clin Nutr.  
521 2020;112: 894S-904S. doi:10.1093/ajcn/nqaa153
- 522 14. USAID Advancing Nutrition. Stunting: considerations for use as an indicator in  
523 nutrition projects. Arlington, VA: USAID Advancing Nutrition. USAID Advancing  
524 Nutrition; 2020. Available:  
525 [https://www.advancingnutrition.org/sites/default/files/2021-](https://www.advancingnutrition.org/sites/default/files/2021-10/usaaid_an_stunting_literature_review_2021.pdf)  
526 [10/usaaid\\_an\\_stunting\\_literature\\_review\\_2021.pdf](https://www.advancingnutrition.org/sites/default/files/2021-10/usaaid_an_stunting_literature_review_2021.pdf)
- 527 15. Dearden KA, Bishwakarma R, Crookston BT, Masau BT, Mulokozi GI. Health  
528 facility-based counselling and community outreach are associated with maternal  
529 dietary practices in a cross-sectional study from Tanzania. BMC Nutr. 2021;7: 1–11.  
530 doi:10.1186/s40795-021-00447-x
- 531 16. Kaleem R, Adnan M, Nasir M, Rahat T. Effects of antenatal nutrition counselling on  
532 dietary practices and nutritional status of pregnant women: A quasi-experimental  
533 hospital based study. Pakistan J Med Sci. 2020;36: 632–636.  
534 doi:10.12669/pjms.36.4.1919
- 535 17. Pérez-Escamilla R, Segura-Pérez S, Hall Moran V. Dietary guidelines for children  
536 under 2 years of age in the context of nurturing care. Matern Child Nutr. 2019;15: 2–4.  
537 doi:10.1111/mcn.12855
- 538 18. Ghosh-Jerath S, Devasenapathy N, Singh A, Shankar A, Zodpey S. Ante natal care

- 539 (ANC) utilization, dietary practices and nutritional outcomes in pregnant and recently  
540 delivered women in urban slums of Delhi, India: an exploratory cross-sectional study.  
541 *Reprod Health*. 2015;12. doi:10.1186/s12978-015-0008-9
- 542 19. Nsiah-Asamoah C, Pereko KKA, Intiful FD. Nutritional counselling interactions  
543 between health workers and caregivers of children under two years: Observations at  
544 selected child welfare clinics in Ghana. *BMC Health Serv Res*. 2019;19: 1–15.  
545 doi:10.1186/s12913-019-4692-y
- 546 20. MINISTRY OF HEALTH. Guidelines on Maternal, Infant, Young Child and  
547 Adolescent Nutrition. Ministry of Health, Uganda; 2021. Available:  
548 [https://www.health.go.ug/cause/guidelines-on-maternal-infant-young-child-and-](https://www.health.go.ug/cause/guidelines-on-maternal-infant-young-child-and-adolescent-nutrition/)  
549 [adolescent-nutrition/](https://www.health.go.ug/cause/guidelines-on-maternal-infant-young-child-and-adolescent-nutrition/)
- 550 21. World Health Organization. WHO recommendations on antenatal care for a positive  
551 pregnancy experience. WHO recommendations on antenatal care for a positive  
552 pregnancy experience. Geneva: World Health Organization; 2020. Available:  
553 [www.who.int/maternal\\_child\\_adolescent](http://www.who.int/maternal_child_adolescent)
- 554 22. Ministry of Health U. INTEGRATING NUTRITION ASSESSMENT ,  
555 COUNSELLING , AND SUPPORT INTO Training Course for Facility-Based Health  
556 Providers. 2016.
- 557 23. Levin CE, Self JL, Kedera E, Wamalwa M, Hu J, Grant F, et al. What is the cost of  
558 integration? Evidence from an integrated health and agriculture project to improve  
559 nutrition outcomes in Western Kenya. *Health Policy Plan*. 2019;34: 646–655.  
560 doi:10.1093/heapol/czz083
- 561 24. Kasiulevičius V, Šapoka V, Filipavičiūtė R. Sample size calculation in  
562 epidemiological studies. *Gerontologija*. 2006;7: 225–231. doi:013165/AIM.0010
- 563 25. Beal SJ, Kupzyk KA. An Introduction to Propensity Scores: What, When, and How. *J*  
564 *Early Adolesc*. 2014;34: 66–92. doi:10.1177/0272431613503215
- 565 26. Valojerdi AE, Janani L. A brief guide to propensity score analysis. *Med J Islam Repub*  
566 *Iran*. 2018;32: 1–4. doi:10.14196/mjiri.32.122
- 567 27. Garrido MM, Kelley AS, Paris J, Roza K, Meier DE, Morrison RS, et al. Methods for  
568 constructing and assessing propensity scores. *Health Serv Res*. 2014;49: 1701–1720.  
569 doi:10.1111/1475-6773.12182
- 570 28. Dehejia RH, Wahba S. Propensity score-matching methods for nonexperimental causal

- 571 studies. *Rev Econ Stat.* 2002;84: 151–161. doi:10.1162/003465302317331982
- 572 29. Taylor RM, Wolfson JA, Lavelle F, Dean M, Frawley J, Hutchesson MJ, et al. Impact  
573 of preconception, pregnancy, and postpartum culinary nutrition education  
574 interventions: A systematic review. *Nutr Rev.* 2021;79: 1186–1203.  
575 doi:10.1093/nutrit/nuaa124
- 576 30. Kim C, Mansoor GF, Paya PM, Ludin MH, Ahrar MJ, Mashal MO, et al. Review of  
577 policies, data, and interventions to improve maternal nutrition in Afghanistan. *Matern  
578 Child Nutr.* 2020;16. doi:10.1111/mcn.13003
- 579 31. Tsegaye D, Tamiru D, Belachew T. Theory-based nutrition education intervention  
580 through male involvement improves the dietary diversity practice and nutritional status  
581 of pregnant women in rural Illu Aba Bor Zone, Southwest Ethiopia: A quasi-  
582 experimental study. *Matern Child Nutr.* 2022;18. doi:10.1111/mcn.13350
- 583 32. Habtu M, Agena AG, Umugwaneza M, Mochama M, Munyanshongore C. Effect of  
584 integrated nutrition-sensitive and nutrition-specific intervention package on maternal  
585 malnutrition among pregnant women in Rwanda. *Matern Child Nutr.* 2022;18.  
586 doi:10.1111/mcn.13367
- 587 33. Kuma MN, Tamiru D, Tefera B. Effects of nutrition education and home gardening  
588 interventions on feto-maternal outcomes among pregnant women in Jimma Zone,  
589 Soutwest Ethiopia: A cluster randomized control trial. *Nutr Health.* 2023;29: 97–105.  
590 doi:10.1177/02601060211056745
- 591 34. Singh V, Ahmed S, Dreyfuss ML, Kiran U, Chaudhery DN, Srivastava VK, et al. An  
592 integrated nutrition and health program package on IYCN improves breastfeeding but  
593 not complementary feeding and nutritional status in rural northern India: A quasi-  
594 experimental randomized longitudinal study. *PLoS One.* 2017;12: 1–20.  
595 doi:10.1371/journal.pone.0185030
- 596 35. Habtu M, Agena AG, Umugwaneza M, Mochama M, Munyanshongore C.  
597 Effectiveness of Integrated Maternal Nutrition Intervention Package on Birth Weight  
598 in Rwanda. *Front Nutr.* 2022;9. doi:10.3389/fnut.2022.874714
- 599 36. González-Fernández D, Mazzini Salom AS, Herrera Bendezu F, Huamán S, Rojas  
600 Hernández B, Pavec I, et al. A Multi-Sectoral Approach Improves Early Child  
601 Development in a Disadvantaged Community in Peru: Role of Community Gardens,  
602 Nutrition Workshops and Enhanced Caregiver-Child Interaction: Project “Wawa  
603 Illari.” *Front Public Heal.* 2020;8. doi:10.3389/fpubh.2020.567900

604

605

606
